# Supplementary material
Source: PubMed Central journal article supplement (PMC3810179)

**A**

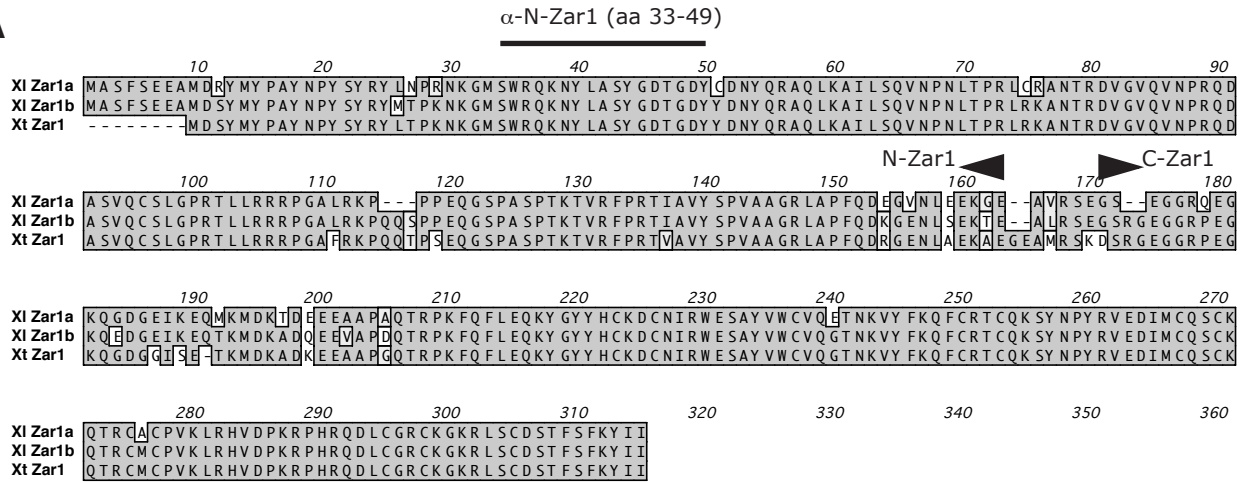

**B**

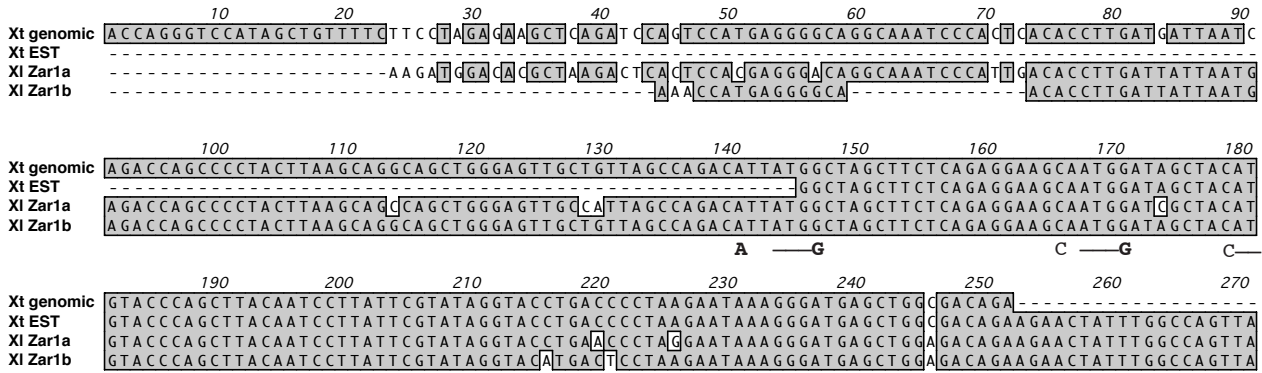

**C**

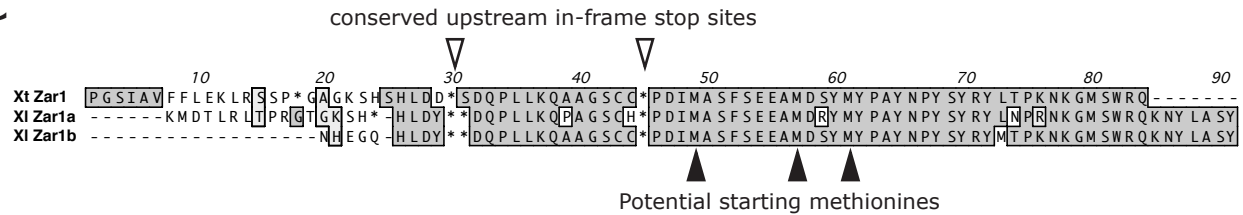

Supplement: NIHMS502792-supplement-1.pdf [file NIHMS502792-supplement-1.pdf]
